# Supplementary material for: Take time: odor coding capacity across sensory neurons increases over time in Drosophila
Source: PubMed Central journal article supplement (PMC5696509; doi:10.1007/s00359-017-1209-1), 2017-08-29
Supplement: 359_2017_1209_MOESM1_ESM.pdf [file 359_2017_1209_MOESM1_ESM.pdf]

Take time: odor coding capacity across sensory neurons increases  
over time in *Drosophila*

Journal of Comparative Physiology A

**Supplemental Material**

Daniel Münch<sup>1,2</sup> and C. Giovanni Galizia<sup>1</sup>

<sup>1</sup>Neurobiology, University of Konstanz, 78457 Konstanz, Germany

<sup>2</sup>daniel.muench@uni-konstanz.de

August 11, 2017

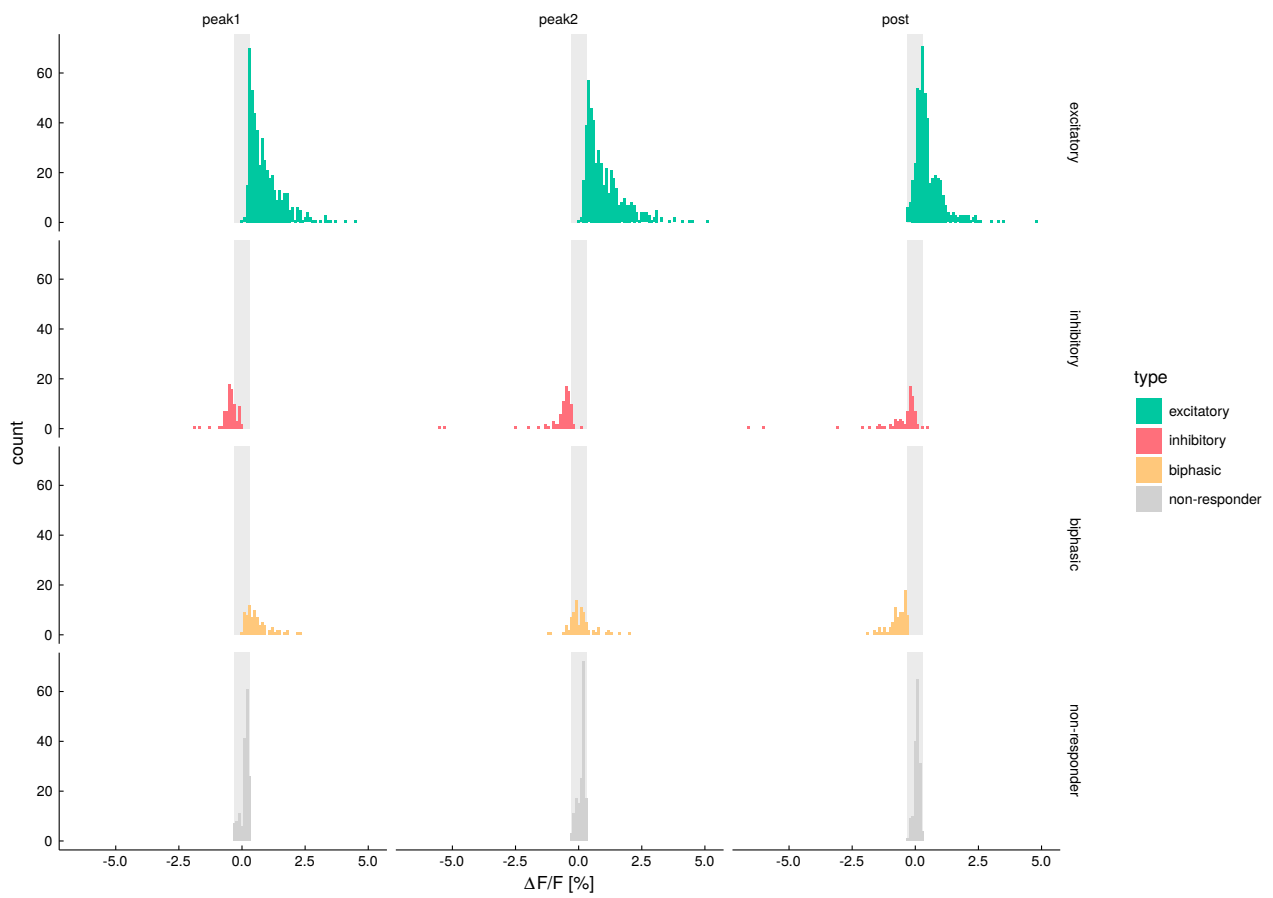

**Figure S1** Related to Figure 1. Histogram of response strength distributions. Colors indicate the response type classification, *gray* shades highlight the  $|0.3\%|\Delta F/F$  ( $\pm 2.5 \times SD$  before stimulus onset) threshold that was used to classify non-responders (see Material & Methods)

**Table S1** List of odorants used in the different experiments

| CODE | Name                            | InChIKey                     | data set    |
|------|---------------------------------|------------------------------|-------------|
| 2EBM | ethyl benzoate                  | MTZQAGJQAFMTAQ-UHFFFAOYSA-N  | 99 odorants |
| 2EPM | 2-ethylphenol                   | IXQGCGWUGDFDQMF-UHFFFAOYSA-N | 99 odorants |
| 2PPM | 2-propylphenol                  | LCHYEKKJCUJAKN-UHFFFAOYSA-N  | 99 odorants |
| 3HXN | 3-hexanone                      | PFCHFHIRKBAQGU-UHFFFAOYSA-N  | 99 odorants |
| 4MPM | 4-methylphenol                  | IWDCLRJOBJJRNH-UHFFFAOYSA-N  | 99 odorants |
| AIOT | $\alpha$ -ionone                | UZFLPKAIBPNNCA-BQYQJAHWSA-N  | 99 odorants |
| AIR  | room air                        |                              | 99 odorants |
| BACE | butyl acetate                   | DKPFZGUDAPQIHT-UHFFFAOYSA-N  | 99 odorants |
| BBTL | $\beta$ -butyrolactone          | GSCLMSFRWBPUK-UHFFFAOYSA-N   | 99 odorants |
| BDOL | 2,3-butanediol                  | OWBTYPJTUOEWEK-UHFFFAOYSA-N  | 99 odorants |
| BEAM | benzaldehyde                    | HUMNYLRZRPPJDN-UHFFFAOYSA-N  | 99 odorants |
| BEDN | 2,3-butanedione                 | QSJXEFYPDANLFS-UHFFFAOYSA-N  | 99 odorants |
| BIOT | $\beta$ -ionone                 | PSQYTAPXSHCGMF-BQYQJAHWSA-N  | 99 odorants |
| BIST | $\alpha$ -bisabolol             | RGZSQWQPBRWIAQ-CABCVRRESA-N  | 99 odorants |
| BNIM | benzoinitrile                   | JFDZBHWFFUWJJE-UHFFFAOYSA-N  | 99 odorants |
| BOLM | benzyl alcohol                  | WVDDGKGOMKODPV-UHFFFAOYSA-N  | 99 odorants |
| BUTA | butanal                         | ZTQSAGDEMFDKMZ-UHFFFAOYSA-N  | 99 odorants |
| BUTN | 2-butanone                      | ZWEHNKRNPVVGH-UHFFFAOYSA-N   | 99 odorants |
| CAPT | (-)-trans-caryophyllene         | NPNUFJAVOOONJE-GFUGXAQUSA-N  | 99 odorants |
| CART | (R)-(-)-carvone                 | ULDHMXUKGWMISQ-SECBINFHSA-N  | 99 odorants |
| CAST | (S)-(+)-carvone                 | ULDHMXUKGWMISQ-VIFPVQESA-N   | 99 odorants |
| CIAT | (S)-(-)-citronellal             | NEHNMFOYXAPHSD-JTQLQIEISA-N  | 99 odorants |
| CINT | 1,8-cineole                     | WEEGYLXZBRQIMU-WAAGHKOSSA-N  | 99 odorants |
| CITT | citral                          | WTEVQBCEXBHNA-JXMROGBWSA-N   | 99 odorants |
| CYHN | cyclohexanone                   | JHIVVAPYMSGYDF-UHFFFAOYSA-N  | 99 odorants |
| DECA | decanal                         | KSMVZQYAVGKIV-UHFFFAOYSA-N   | 99 odorants |
| DECL | decanol                         | MWKFXSUHUHTGQN-UHFFFAOYSA-N  | 99 odorants |
| DMBM | 4-allyl-1,2-dimethoxybenzene    | ZYEMGPIYFIJGTP-UHFFFAOYSA-N  | 99 odorants |
| E3HE | ethyl 3-hydroxyhexanoate        | LYRIITRHCNUHV-UHFFFAOYSA-N   | 99 odorants |
| EHAE | E2-hexenyl acetate              | HRHOWZHRZRVCU-WAYWQWQTSAN    | 99 odorants |
| EIVE | ethyl isovalerate               | PPXUHEORWJQRHJ-UHFFFAOYSA-N  | 99 odorants |
| EM2E | ethyl 2-methyl-2e-butenolate    | OAPHLAAOJMTMLY-GQCTYLIASA-N  | 99 odorants |
| EMBE | ethyl 2-methylbutyrate          | HCRBXQFHJMCTLF-UHFFFAOYSA-N  | 99 odorants |
| ERHE | ethyl (R)-(-)-3-hydroxybutyrate | OMSUIQOIVADKIM-RXMQYKEDSAN   | 99 odorants |
| ESHE | ethyl (S)-(+)-3-hydroxybutyrate | OMSUIQOIVADKIM-YFKPBYRVSA-N  | 99 odorants |
| ETAS | acetic acid                     | QTBSBXVTEAMEQO-UHFFFAOYSA-N  | 99 odorants |
| EUGM | eugenol                         | RRAFCDWBNXTKKO-UHFFFAOYSA-N  | 99 odorants |
| FART | E,E-farnesol                    | CRDAMVZIKSXFV-YFVJMOTDSA-N   | 99 odorants |
| FENT | (1R)-(-)-fenchone               | LHXDLQBQYFFVNW-OIBJUYFYSA-N  | 99 odorants |
| FURL | furfural                        | HYBBIBNJHNGZAN-UHFFFAOYSA-N  | 99 odorants |
| GERT | geraniol                        | GLZPCOQZEFWAFX-JXMROGBWSA-N  | 99 odorants |
| GVAL | $\gamma$ -valerolactone         | GAEKPEKJCKEMS-UHFFFAOYSA-N   | 99 odorants |
| HEPA | heptanal                        | FXHGKSSBGDXIY-UHFFFAOYSA-N   | 99 odorants |
| HEPK | heptane                         | IMNFDUFMRHMDMM-UHFFFAOYSA-N  | 99 odorants |
| HEPN | 2-heptanone                     | CATSNJVOTSVZJV-UHFFFAOYSA-N  | 99 odorants |
| HEPS | heptanoic acid                  | MNWFXYAAOYHMED-UHFFFAOYSA-N  | 99 odorants |
| HEXA | hexanal                         | JARKCYVAAOWBJS-UHFFFAOYSA-N  | 99 odorants |
| HEXN | 2-hexanone                      | QQZOPKMRPOGIEB-UHFFFAOYSA-N  | 99 odorants |
| HEXS | hexanoic acid                   | FUZZWVXGSPDMH-UHFFFAOYSA-N   | 99 odorants |
| HP2L | 2-heptanol                      | CETWUZRCINIHU-UHFFFAOYSA-N   | 99 odorants |
| HPAE | heptyl acetate                  | ZCZSIDMEHXZRLG-UHFFFAOYSA-N  | 99 odorants |
| HX2A | E2-hexenal                      | MBDOYVVRWFFCFHM-SNAWJCMRSA-N | 99 odorants |
| HX2L | 2-hexanol                       | QNVRIHYSUZMSGM-UHFFFAOYSA-N  | 99 odorants |
| HX3L | 1-hexen-3-ol                    | EVOSZSHEZQJOI-UHFFFAOYSA-N   | 99 odorants |
| HXAE | hexyl acetate                   | AOGQPLXWSUTHQB-UHFFFAOYSA-N  | 99 odorants |

Table S1 *continued*

| CODE | Name                                      | InChIKey                     | data set    |
|------|-------------------------------------------|------------------------------|-------------|
| HXBE | hexyl butyrate                            | XAPCMTMQBXLDBB-UHFFFAOYSA-N  | 99 odorants |
| HXME | hexyl methanoate                          | OUGPMNMLWKSERI-UHFFFAOYSA-N  | 99 odorants |
| IATE | isoamyl tiglate                           | ZARFDQHJMNVNLE-WEVVVXLNSA-N  | 99 odorants |
| IEUM | iso-eugenol                               | BJIOGJUNALELMI-ONEGZZNKSA-N  | 99 odorants |
| IPBE | isopropyl butyrate                        | FFOPEPMHKILNIT-UHFFFAOYSA-N  | 99 odorants |
| IPTE | isopropyl tiglate                         | VUPBIVVRPJDNW-FNORWQNLSA-N   | 99 odorants |
| LIMT | (R)-(+)-limonene                          | XMGQYMWDOXHJM-JTQLQIEISA-N   | 99 odorants |
| LINT | linalool                                  | CDOHBSSEJOMGT-UHFFFAOYSA-N   | 99 odorants |
| M3HE | methyl 3-hydroxy hexanoate                | ACCRBMDJCPPJDX-UHFFFAOYSA-N  | 99 odorants |
| MBAE | 2-methyl butyl acetate                    | XHIUFYZDQBSEMF-UHFFFAOYSA-N  | 99 odorants |
| MBAM | 4-methoxybenzaldehyde                     | ZRSNZINYAWTAHE-UHFFFAOYSA-N  | 99 odorants |
| MBUL | 3-methyl-butanol                          | PHTQWCKDNZKARW-UHFFFAOYSA-N  | 99 odorants |
| MCHL | 4-methylcyclohexanol                      | MQWCXKKGQLNYQG-UHFFFAOYSA-N  | 99 odorants |
| MEBM | 4-methoxybenzene                          | RDOXTESZEPMUJZ-UHFFFAOYSA-N  | 99 odorants |
| MJSM | methyl jasmonate                          | GEWDNTWNSAZUDX-SNAWJCMRSA-N  | 99 odorants |
| MOL  | mineral oil                               | solvent                      | 99 odorants |
| MPRS | isobutyric acid                           | KQNPFTWMSNSAP-UHFFFAOYSA-N   | 99 odorants |
| MSAM | methyl salicylate                         | OSWPMRLSEHDHFF-UHFFFAOYSA-N  | 99 odorants |
| MTIE | methyl tiglate                            | YYJWBYNQJLBIGS-PLNGDYQASA-N  | 99 odorants |
| MYRT | (1R)-(-)-myrtenal                         | KMRMUZKLFIEVAO-UHFFFAOYSA-N  | 99 odorants |
| NONA | nonanal                                   | GYHFUZHODSMOHU-UHFFFAOYSA-N  | 99 odorants |
| NONK | nonane                                    | BKIMMITUMNQMS-UHFFFAOYSA-N   | 99 odorants |
| NONN | nonanone                                  | VKCYHJWLTYUGCC-UHFFFAOYSA-N  | 99 odorants |
| NONS | nonanoic acid                             | FBUKVWPVEMHYJY-UHFFFAOYSA-N  | 99 odorants |
| OC3L | 3-octanol                                 | NMRPBPVERJPACX-UHFFFAOYSA-N  | 99 odorants |
| OC4L | 4-octanol                                 | WOFPPJOZUTRAU-UHFFFAOYSA-N   | 99 odorants |
| OCTA | octanal                                   | NUJGJRNETAIRJ-UHFFFAOYSA-N   | 99 odorants |
| OCTK | octane                                    | TVMXDCGIABBOFY-UHFFFAOYSA-N  | 99 odorants |
| OCTN | 2-octanone                                | ZPVFVWPFBNIEHJ-UHFFFAOYSA-N  | 99 odorants |
| OCTS | octanoic acid                             | WWZKQHOCKIZLMA-UHFFFAOYSA-N  | 99 odorants |
| P2ON | 3-penten-2-one                            | LABTWGUMFABVFG-ARJAWSKDSA-N  | 99 odorants |
| PANM | 4-propenyl anisole                        | RUVINXPYWBROJD-ONEGZZNKSA-N  | 99 odorants |
| PENA | pentanal                                  | HGBOYTHUEUWSSQ-UHFFFAOYSA-N  | 99 odorants |
| PENS | pentanoic acid                            | NQPDZGIKBAWPEJ-UHFFFAOYSA-N  | 99 odorants |
| PINT | (+)- $\alpha$ -pinene                     | GRWFGVWFFZKLT-I-RKDXNWHRSA-N | 99 odorants |
| PRBL | $\gamma$ -propyl- $\gamma$ -butyrolactone | VLSVVMPLPMNBH-UHFFFAOYSA-N   | 99 odorants |
| PROA | propanal                                  | NBBJYMSMWIIQGU-UHFFFAOYSA-N  | 99 odorants |
| PRON | acetone                                   | CSCPPACGZOOZCGX-UHFFFAOYSA-N | 99 odorants |
| PROS | propanoic acid                            | XBDQKXXYIPTUBI-UHFFFAOYSA-N  | 99 odorants |
| PULT | (R)-(+)-pulegon                           | NZGWDASTMWDZIW-MRVVSSYSA-N   | 99 odorants |
| TERT | $\alpha$ -terpineol                       | WUOACPNHFRMFPN-SECBINFHSA-N  | 99 odorants |
| THUT | (-)- $\alpha$ -thujone                    | USMNOWBWPYHQA-MRTMQBJTSA-N   | 99 odorants |
| Z3HL | Z3-hexenol                                | UFLHIIWVXFJIGU-ARJAWSKDSA-N  | 99 odorants |
| ZHAE | Z3-hexenyl acetate                        | NPFVVOOAXDOBCE-PLNGDYQASA-N  | 99 odorants |
| ESHE | ethyl (S)-(+)-3-hydroxybutyrate           | OMSUIQIIVADKIM-YFKPBYRVA-N   | mix set 1   |
| ETAS | acetic acid                               | QTBSBXVTEAMEQO-UHFFFAOYSA-N  | mix set 1   |
| GEST | geranyl acetate                           | HIGQPQRQIQDZMP-DHZHZOJOSA-N  | mix set 1   |
| PROA | propanal                                  | NBBJYMSMWIIQGU-UHFFFAOYSA-N  | mix set 1   |
| Z3HL | Z3-hexenol                                | UFLHIIWVXFJIGU-ARJAWSKDSA-N  | mix set 1   |
| ETBE | ethyl butyrate                            | OBNCKNCVKJDNBV-UHFFFAOYSA-N  | mix set 2   |
| ISOE | isopentyl acetate                         | MLFHJEHSLIIPHL-UHFFFAOYSA-N  | mix set 2   |
| FURL | furfural                                  | HYBBIBNJHNGZAN-UHFFFAOYSA-N  | mix set 2   |
| PE2L | 2-pentanol                                | JYVLIDXNZAXMDK-UHFFFAOYSA-N  | mix set 2   |
| PELM | phenethyl alcohol                         | WRMNCZEMHIOCP-UHFFFAOYSA-N   | mix set 2   |

**Table S2** Related to Fig. 5. List of odorants sorted according to overall strength, see Material & Methods for details regarding the calculation of “overall strength”

| rank | set 1 | rank | set 2 | rank | set 3 | rank | set 4 |
|------|-------|------|-------|------|-------|------|-------|
| 1    | BEDN  | 26   | HXME  | 51   | HX2A  | 75   | DMBM  |
| 2    | ESHE  | 27   | M3HE  | 52   | THUT  | 76   | HPAE  |
| 3    | HX2L  | 28   | OC4L  | 53   | E3HE  | 77   | OCTK  |
| 4    | ETAS  | 29   | BOLM  | 54   | IATE  | 78   | HEXA  |
| 5    | P2ON  | 30   | CINT  | 55   | MBAE  | 79   | 2PPM  |
| 6    | MCHL  | 31   | HEPN  | 56   | PANM  | 80   | PINT  |
| 7    | ERHE  | 32   | GVAL  | 57   | OCTN  | 81   | CYHN  |
| 8    | PROS  | 33   | LINT  | 58   | MBUL  | 82   | LIMT  |
| 9    | 3HXN  | 34   | PULT  | 59   | HEXN  | 83   | HEPK  |
| 10   | HP2L  | 35   | EMBE  | 60   | GERT  | 84   | NONK  |
| 11   | 2EBM  | 36   | BACE  | 61   | CAPT  | 85   | BUTA  |
| 12   | Z3HL  | 37   | FURL  | 62   | BUTN  | 86   | IPTE  |
| 13   | FENT  | 38   | CAST  | 63   | BIOT  | 87   | BIST  |
| 14   | BEAM  | 39   | BNIM  | 64   | FART  | 88   | HEPA  |
| 15   | MTIE  | 40   | MBAM  | 65   | PENA  | 89   | DECA  |
| 16   | PRBL  | 41   | CITT  | 66   | EHAE  | 90   | OCTA  |
| 17   | OC3L  | 42   | MPRS  | 67   | HXBE  | 91   | IPBE  |
| 18   | MSAM  | 43   | CIAT  | 68   | HXAE  | 92   | PRON  |
| 19   | PROA  | 44   | EIVE  | 69   | DECL  | 93   | IEUM  |
| 20   | HX3L  | 45   | PENS  | 70   | EUGM  | 94   | MOL   |
| 21   | BDOL  | 46   | CART  | 71   | NONN  | 95   | HEPS  |
| 22   | BBTL  | 47   | MEBM  | 72   | MJSM  | 96   | HEXS  |
| 23   | TERT  | 48   | ZHAE  | 73   | MYRT  | 97   | NONS  |
| 24   | EM2E  | 49   | 2EPM  | 74   | NONA  | 98   | AIR   |
| 25   | AIOT  | 50   | 4MPM  | 75   | DMBM  | 99   | OCTS  |

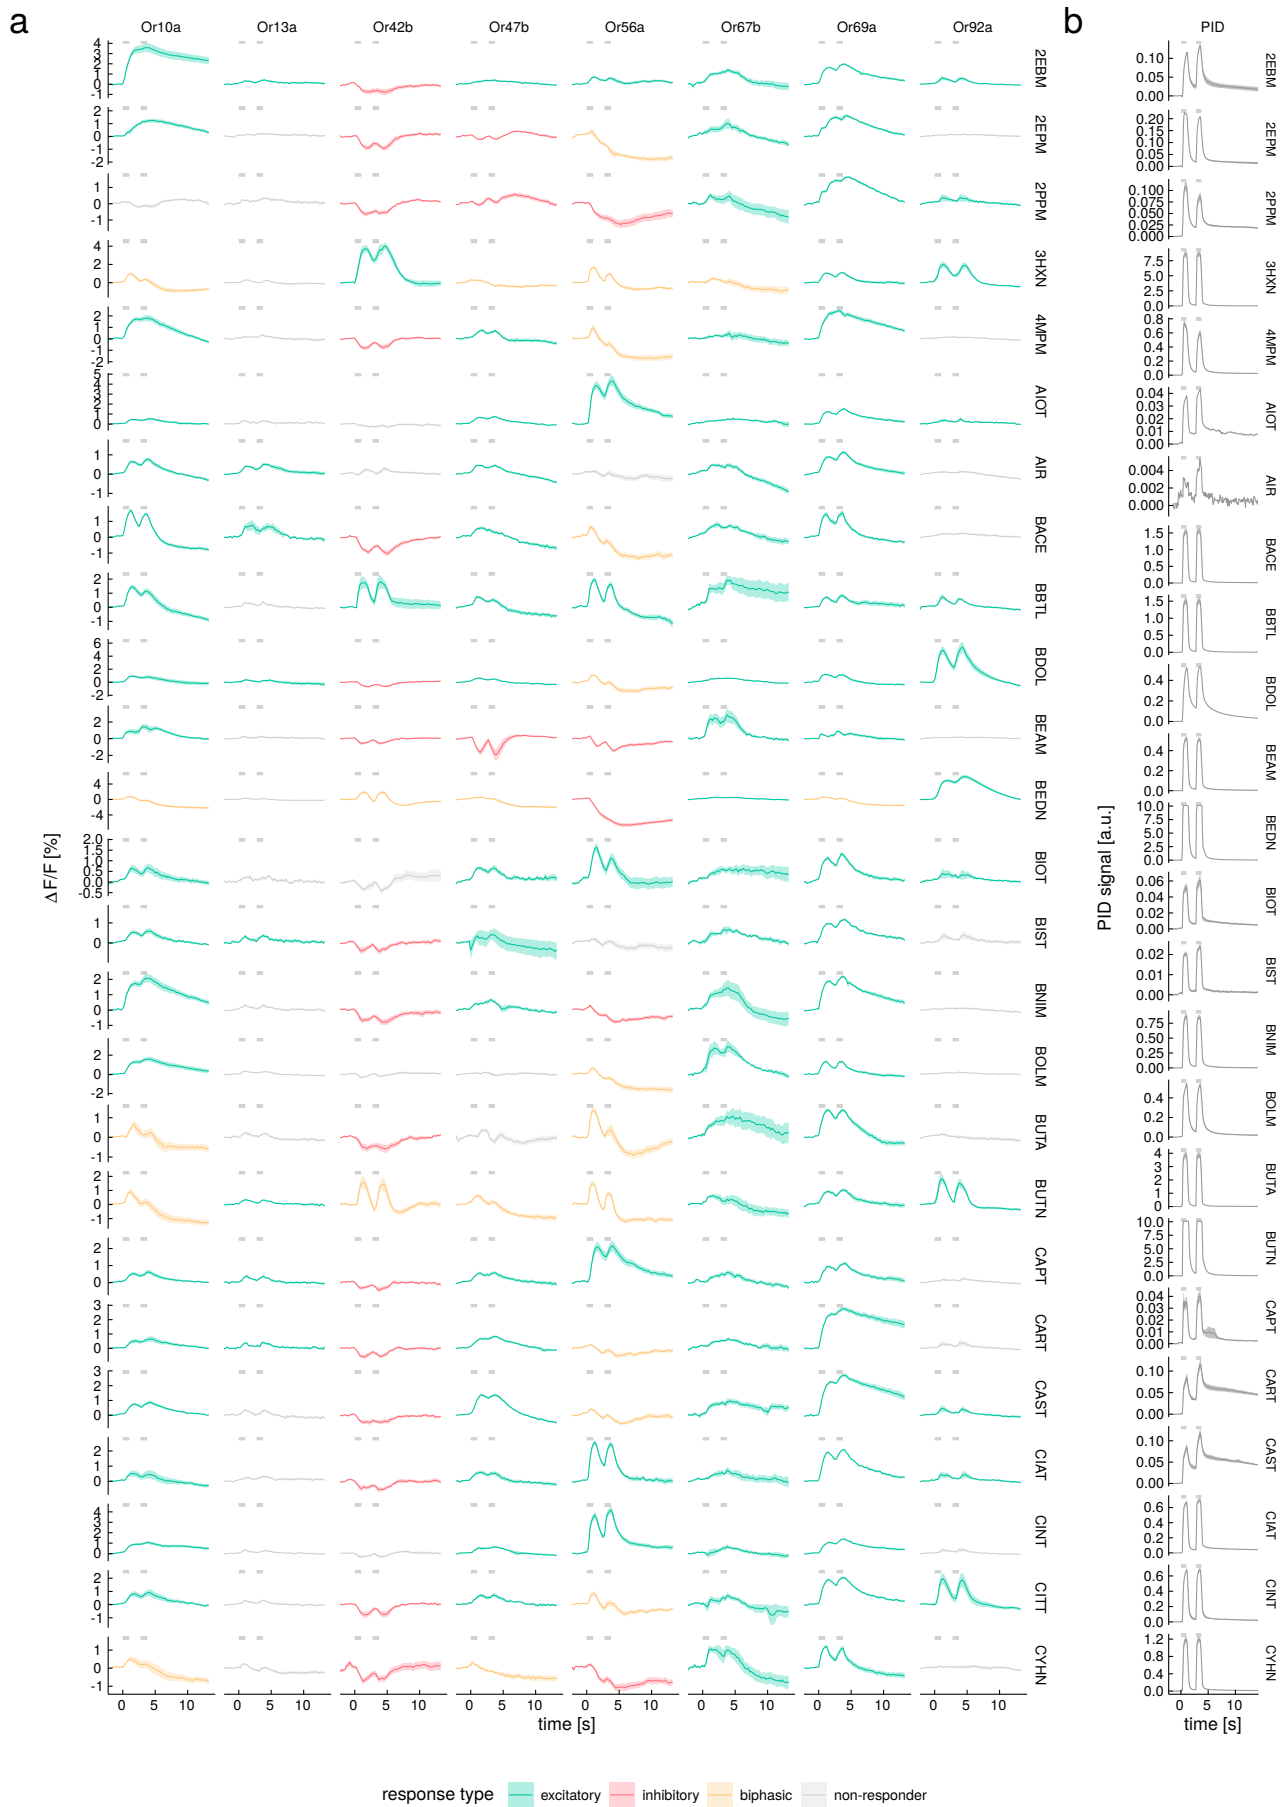

**Figure S2** Related to Figure 2. **a** Response traces for all odorant-OSN combinations tested. Traces are given as average of  $n = 3-28$  animals (median = 8), shades indicate SEM. **b** PID recordings of 99 odorants tested. Traces are given as average of  $n = 1-3$  independent measurements (median = 3), shades indicate SEM

**a**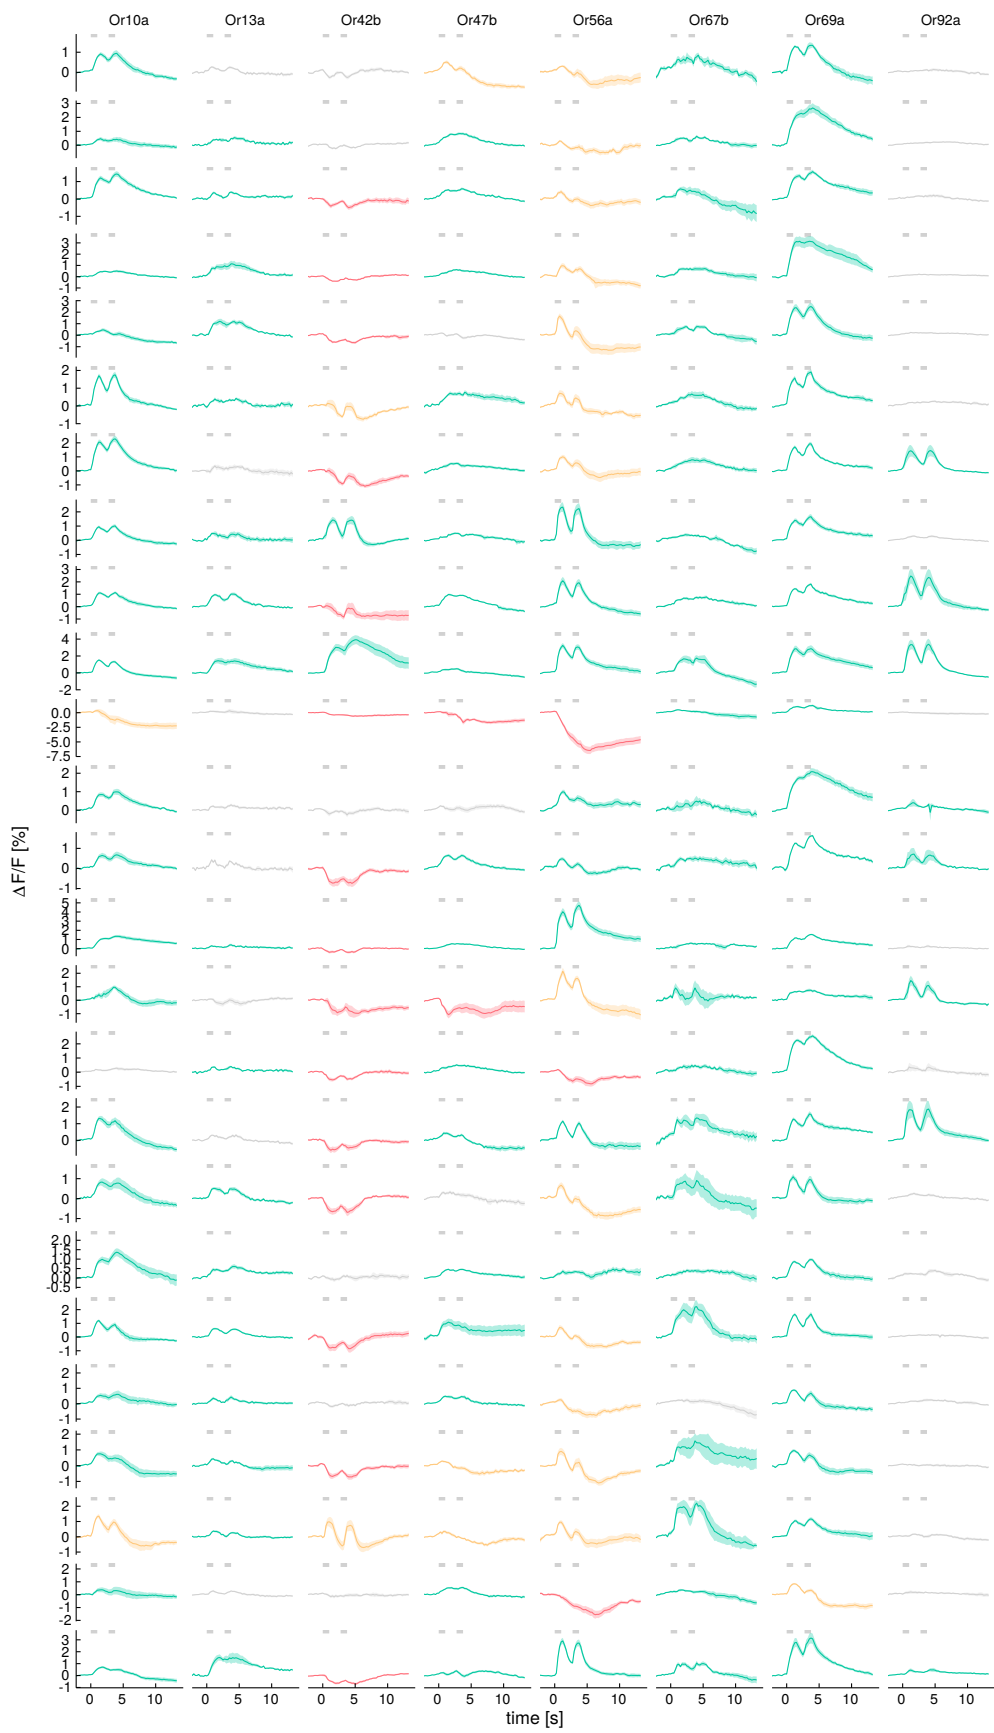**b**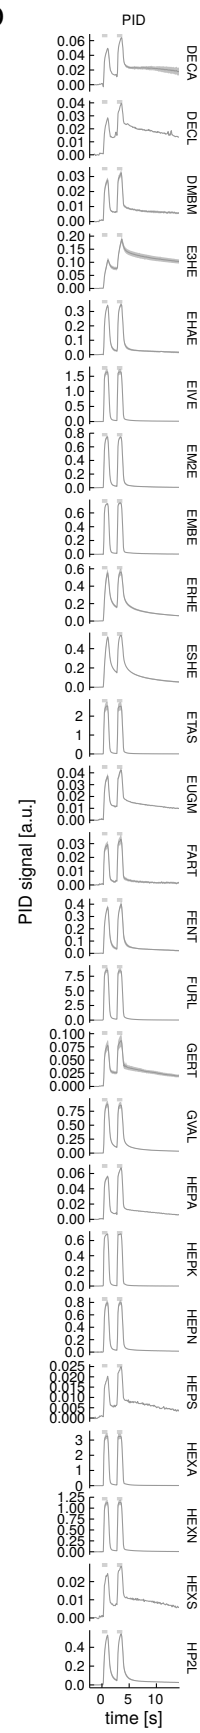

response type    excitatory    inhibitory    biphasic    non-responder

**Figure S2** *continued*

**a**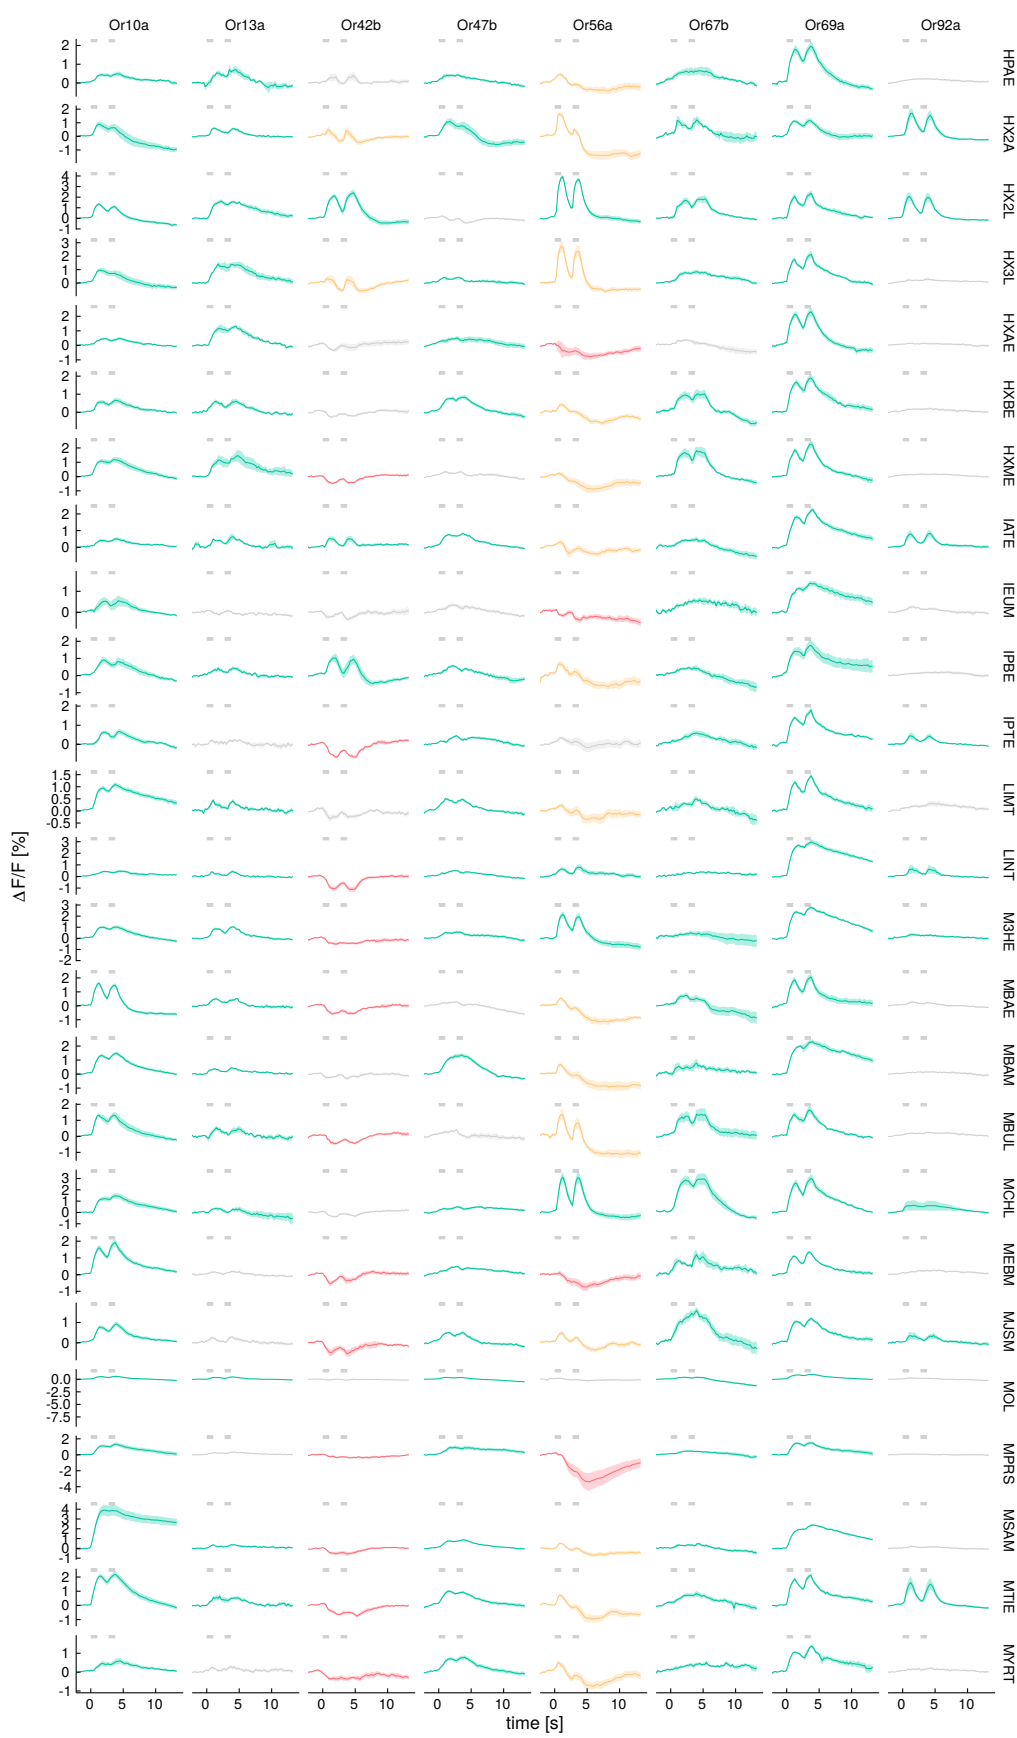**b**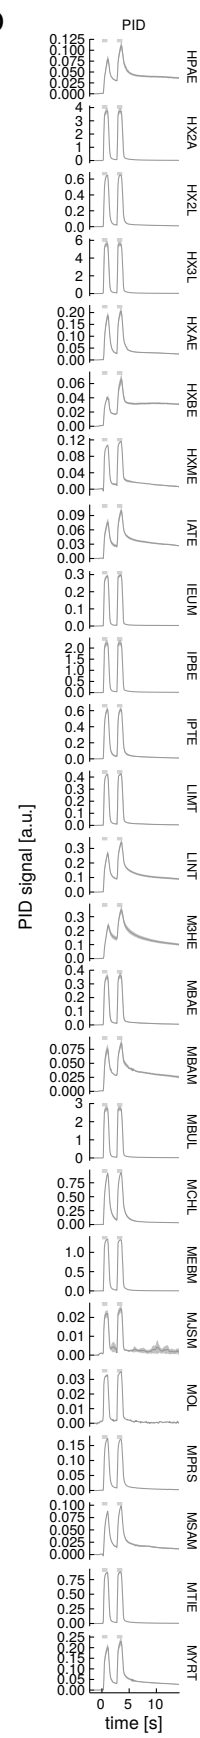

response type █ excitatory █ inhibitory █ biphasic █ non-responder

**Figure S2** *continued*



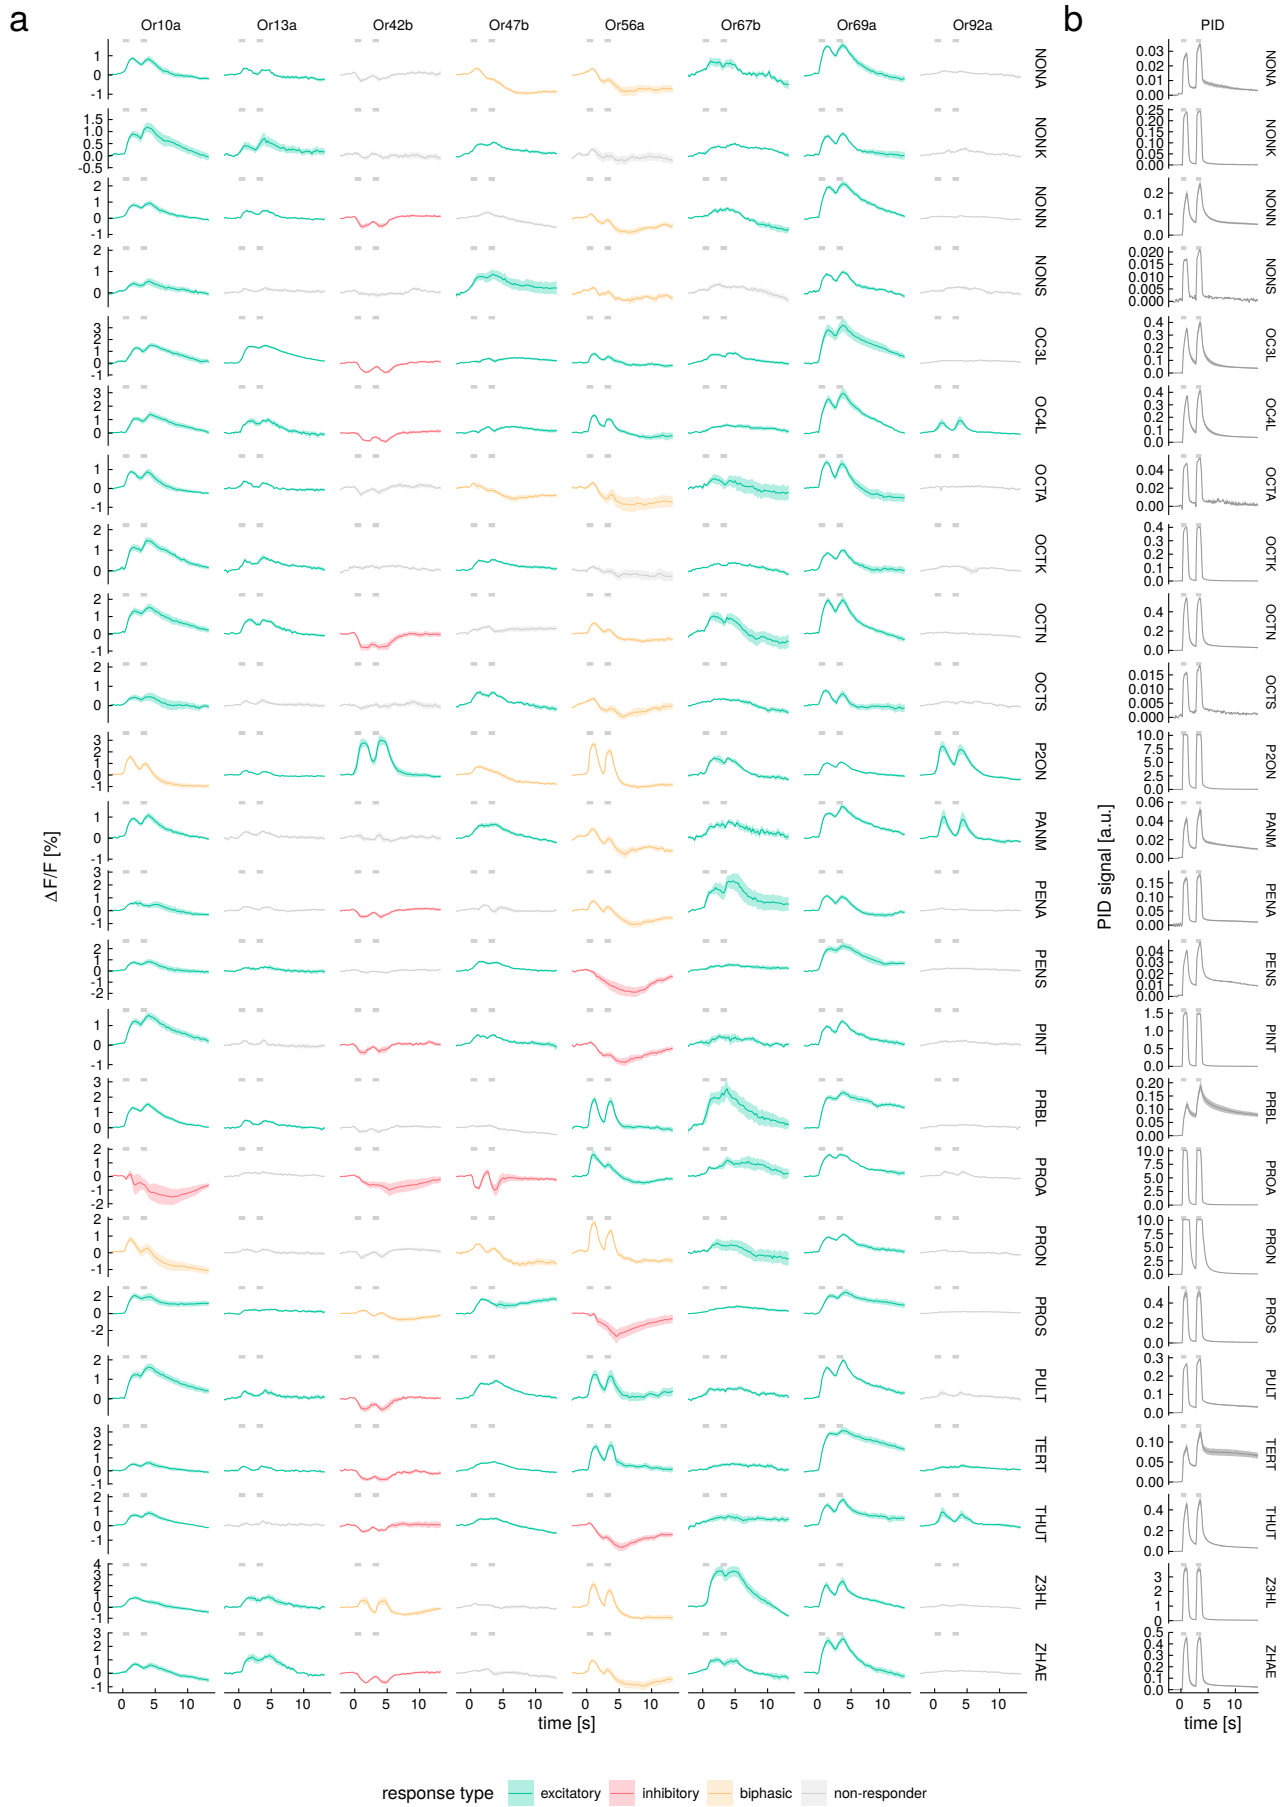

Figure S2 *continued*

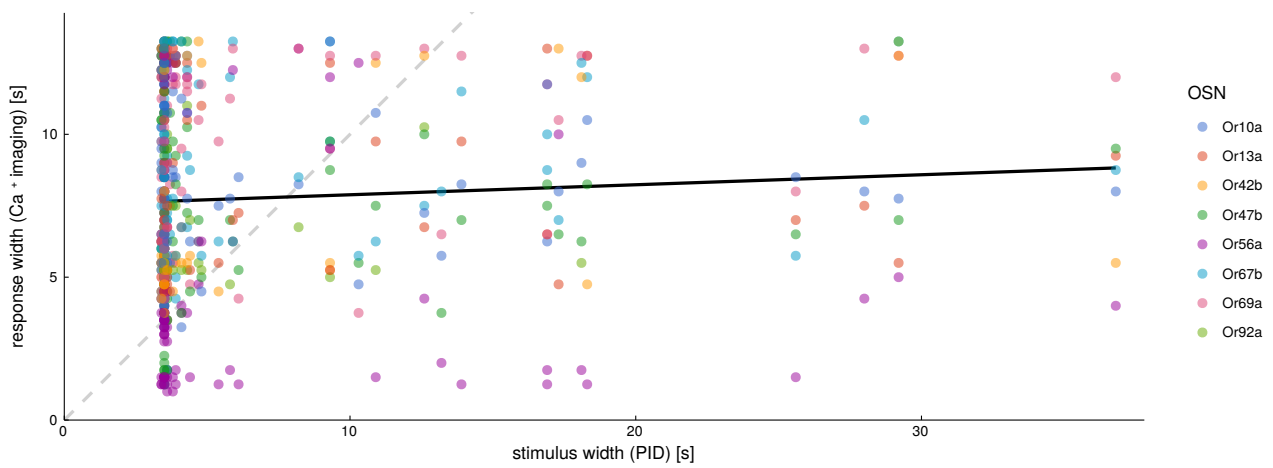

**Figure S3** Related to Figure 2. Response width vs stimulus width. Widths of stimuli and responses were not correlated (Pearson's correlation coefficient  $r = 0.06$ ,  $p = 0.15$ ). Response width was calculated from average response traces ( $n = 3-295$ , median = 8), stimulus duration from mean PID measurements ( $n = 1-3$ , median = 3). Widths were calculated as the time during which the calcium response or PID measurement was larger than 30% peak response ( $response > 0.3 * response_{peak}$ ). Only responses categorized as “responders” were included in this analysis. The *gray dashed* line indicates unity, the *black* line shows a linear fit. Colors indicate the OSN that was recorded

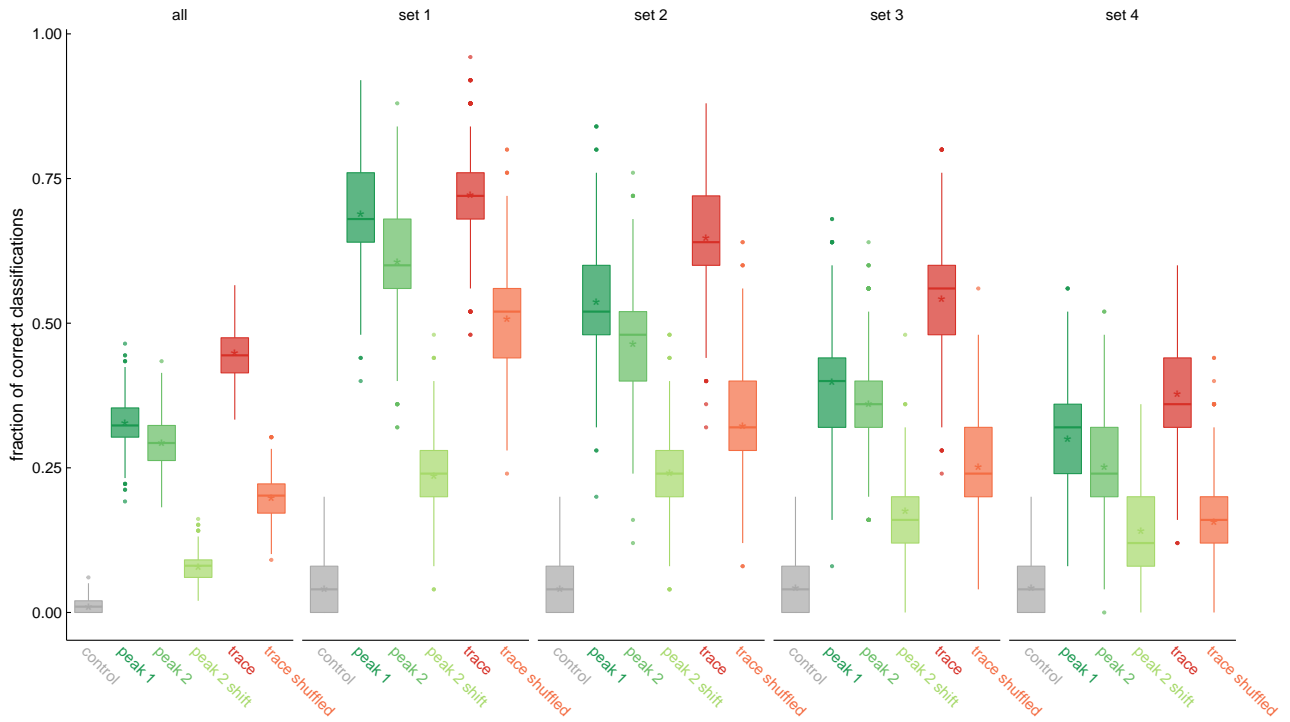

**Figure S4** Related to Figure 5. Boxplot of the classifier performance at different time-points. *control* classification with shuffled odor-labels, *peak 1* & *peak 2* five time-points around the 1st and 2nd response peak, *peak 2 shift* classification run on peak 2 but with the activity right prior to peak 2 shifted to 0, *trace* five time-points spread across the recording, *trace shuffled* classification run on the *trace* frames but with scrambled time information. *all* comprises all odorants, *set 1* to *set 4* are subsets derived by ordering odorants according to the overall strength they elicited across the eight sensory neurons (quantified as mean absolute peak response across OSNs), with *set 1* containing the 25 strongest odorants and *set 4* the 25 weakest odorants (see Tab. S2 for a list of all odorants). All differences between classifications at different time points were significant (Kruskal-Wallis rank sum test with a Bonferroni corrected Dunn’s post-hoc test,  $p < 0.05$ ). *Boxplots* indicate median, lower and upper quartile, *whiskers* extend to the lowest and highest values that lie within 1.5 times the inter-quartile range from the box, data beyond the whiskers are treated as outliers and indicated as *points*, *asterisks* indicate the mean

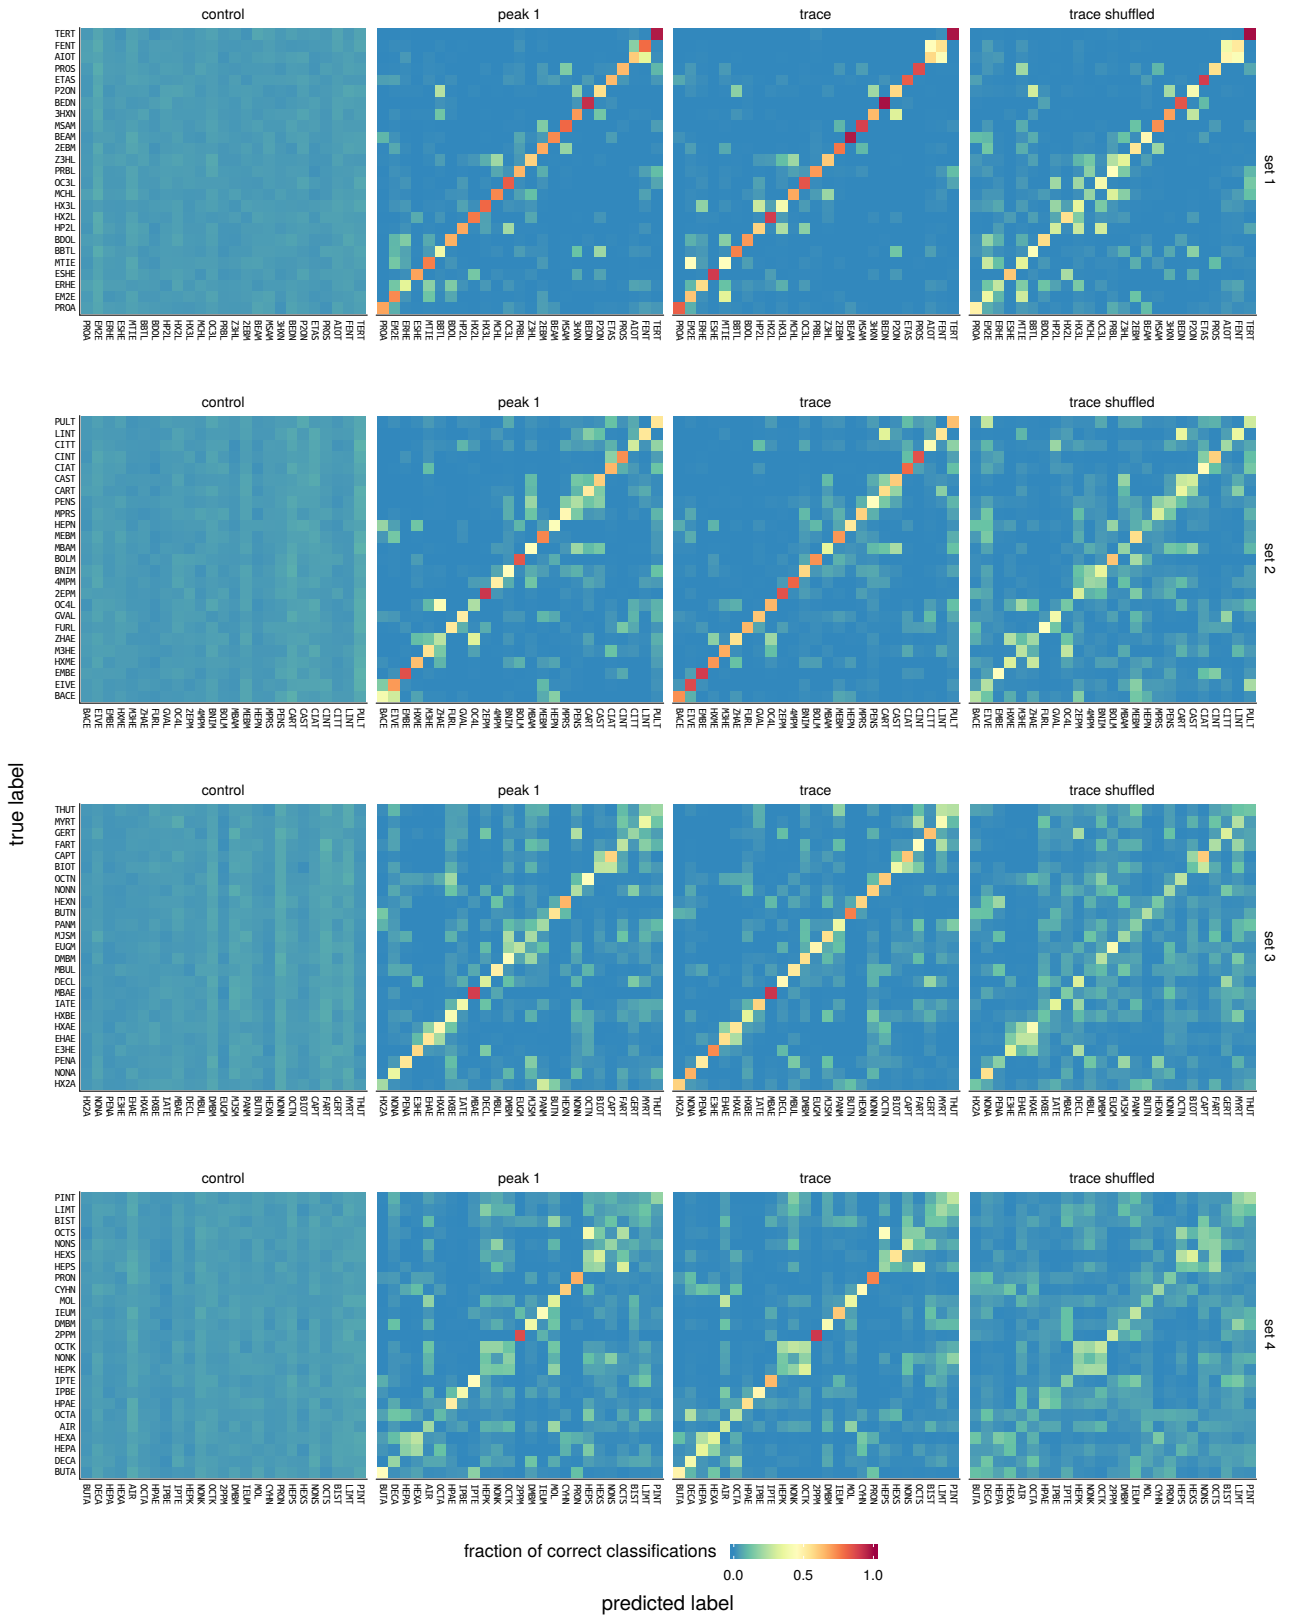

**Figure S5** Related to Figure 5. Correct classifications and classification errors in the sets of the strongest and the weakest odorants at the different time-points, visualized as confusion matrices. The values along the diagonal represent classification reliability. See Tab.S1 for a complete list of odorant names & abbreviations.

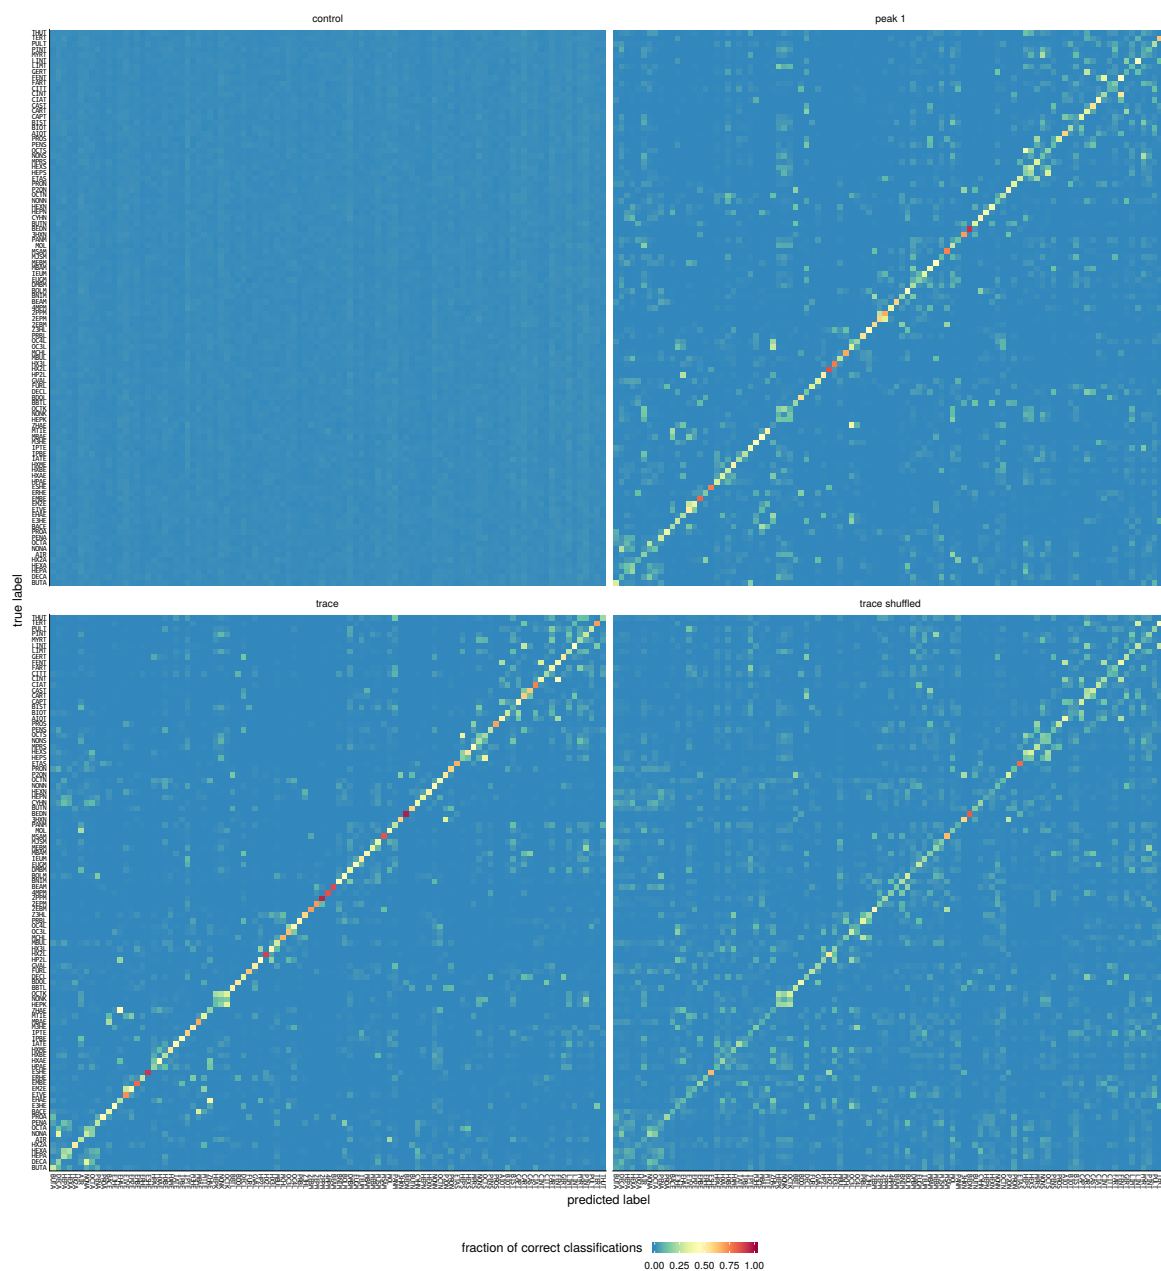

**Figure S6** Related to Figure 5. Correct classifications and classification errors in the sets of the strongest and the weakest odorants at the different time-points, visualized as confusion matrices. The values along the diagonal represent classification reliability. See Tab.S1 for a complete list of odorant names & abbreviations

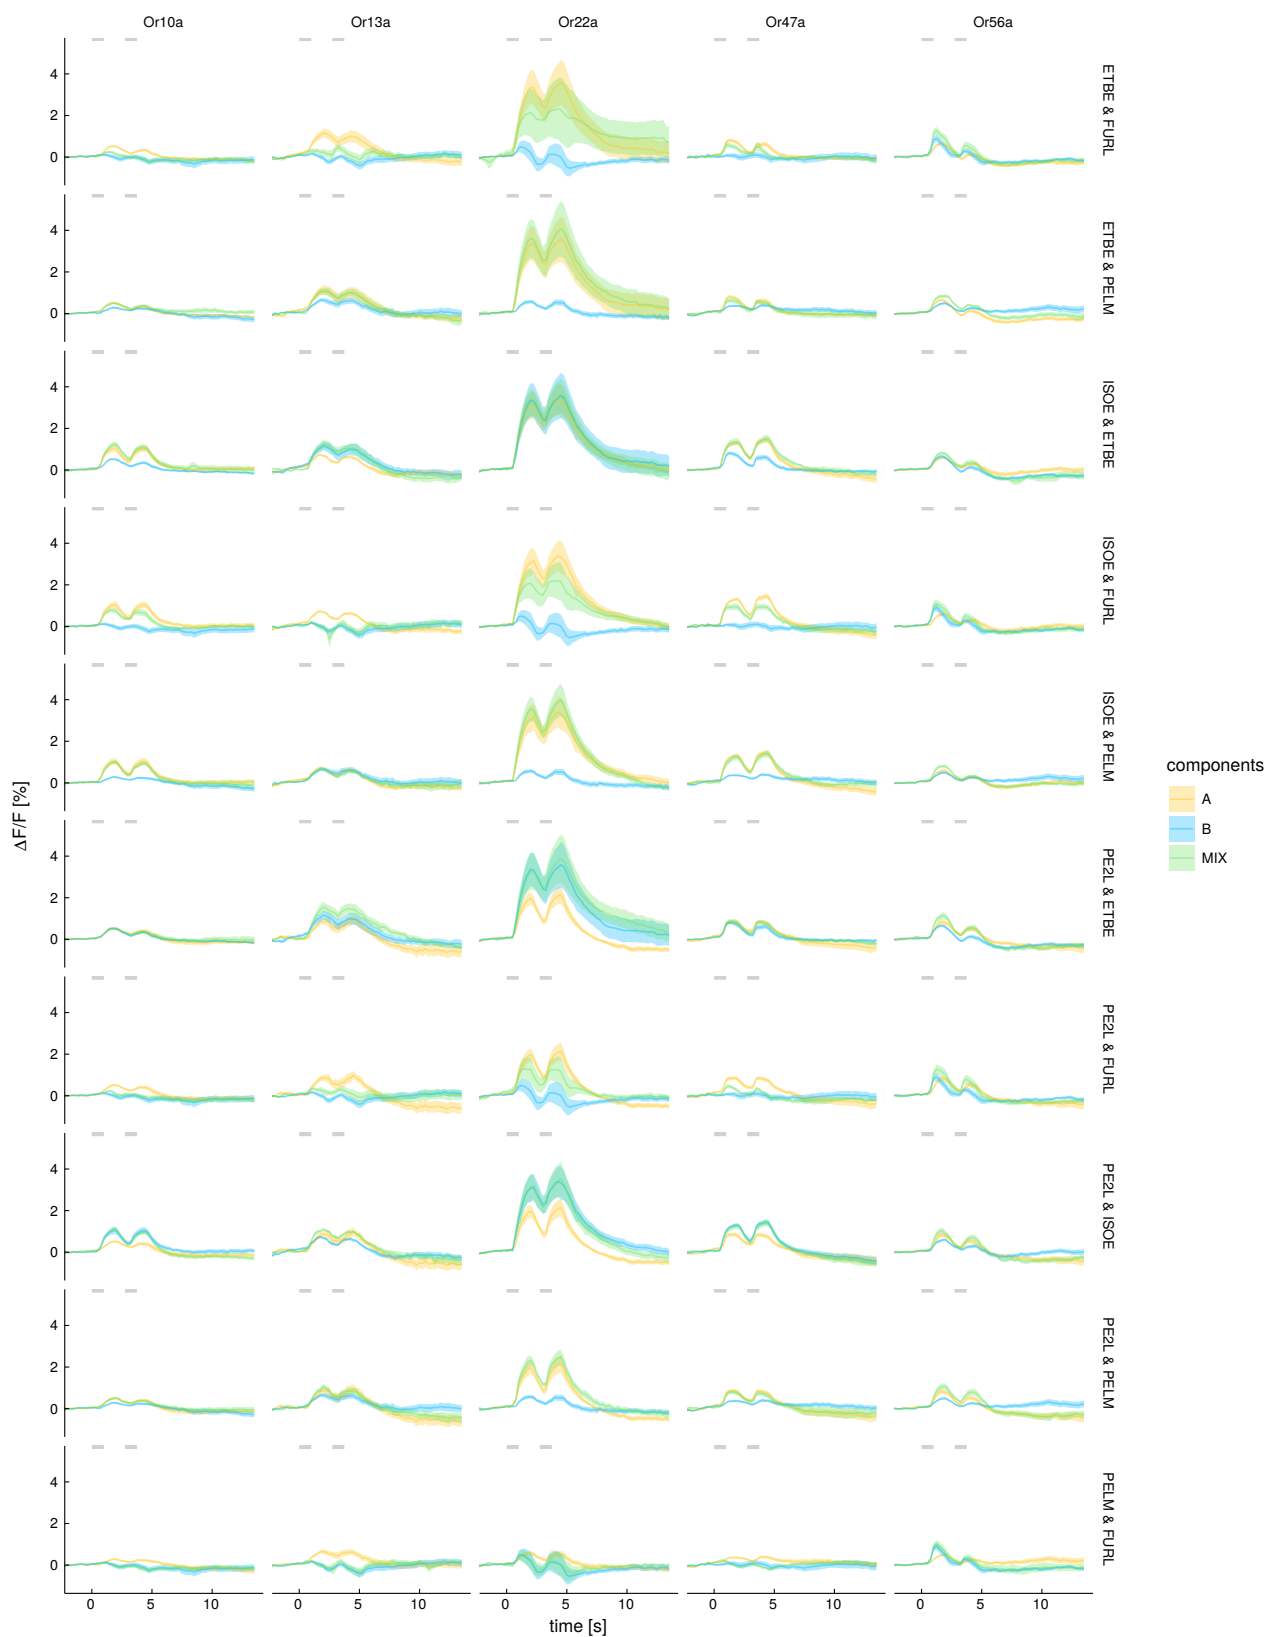

**Figure S7** Related to Figure 6. Response traces elicited from binary mixtures of odorants. The mixture trace is shown in green, the components are shown in yellow and blue, gray segments indicate the stimulation times. Concentration of the components was the same when tested alone or in the mixture ( $1 \times 10^{-3}$  vol/vol dilution). n = 5-18

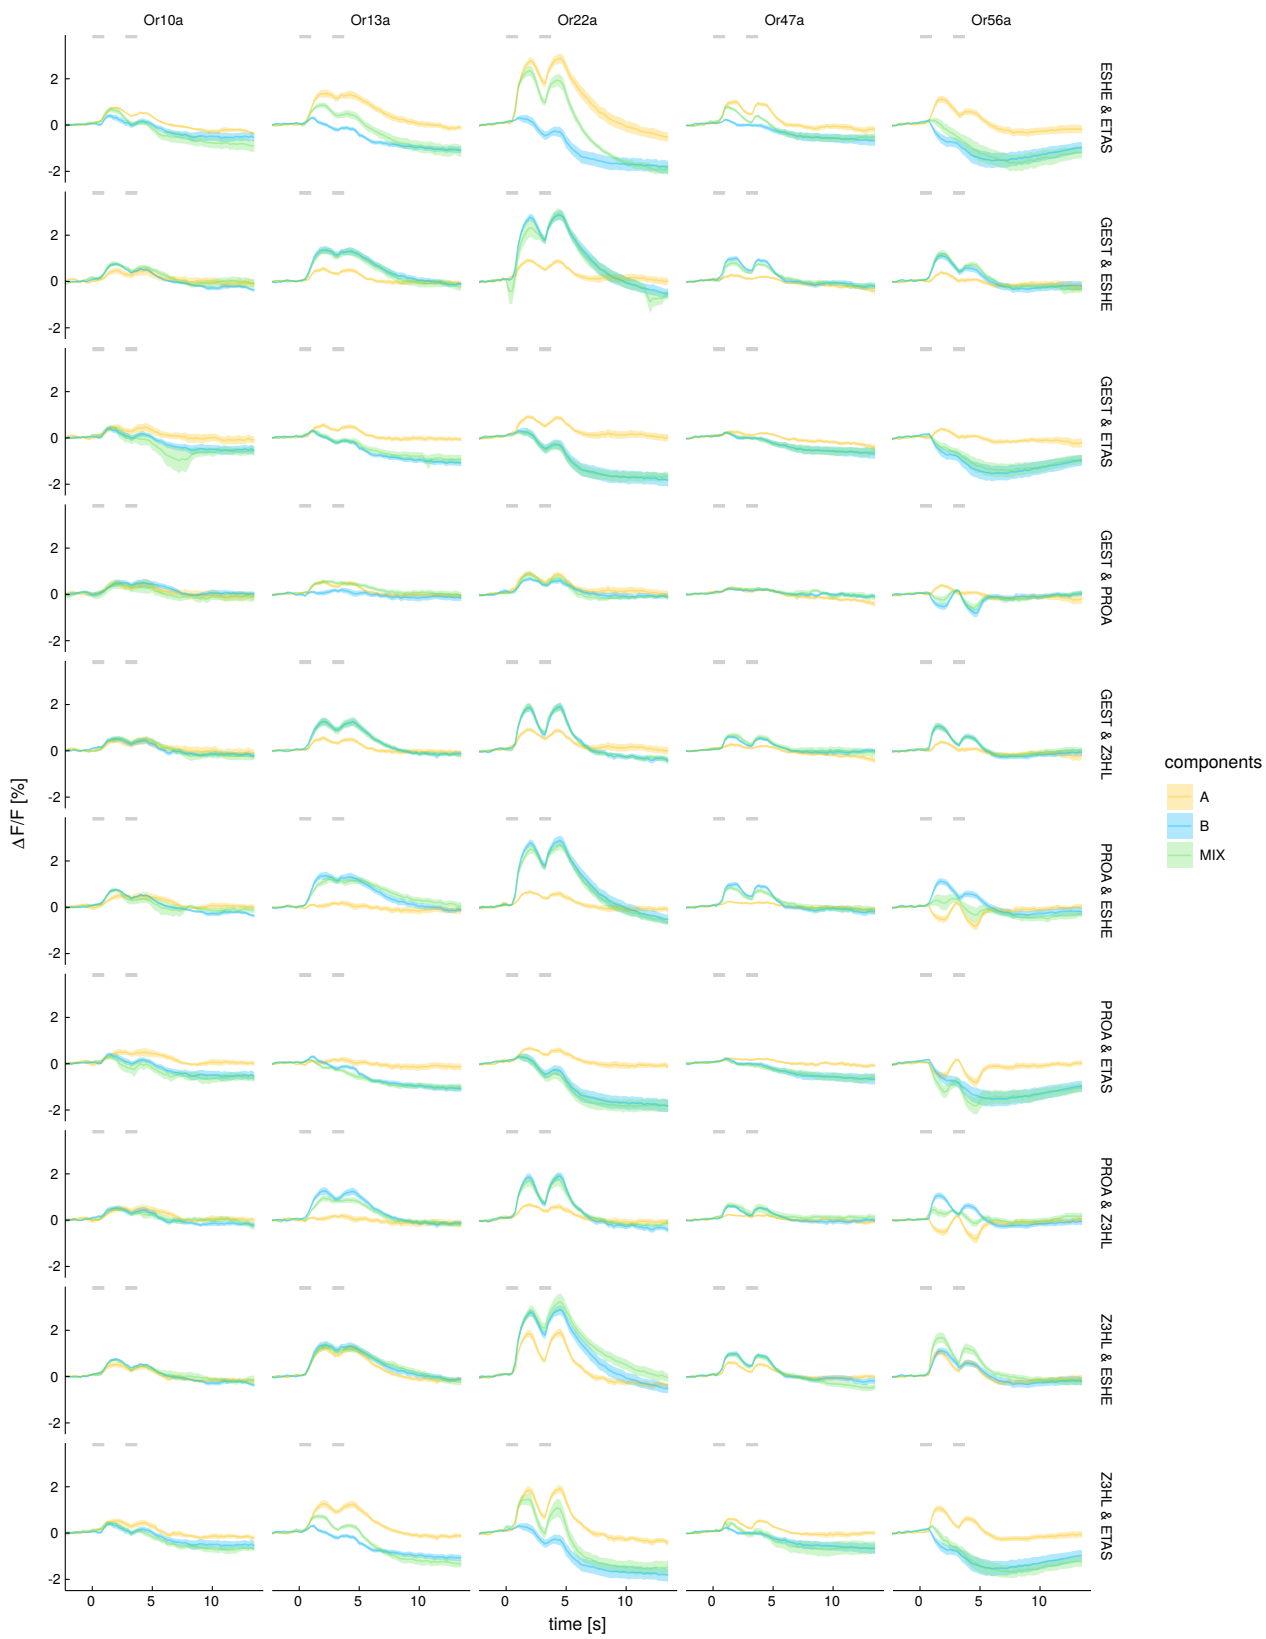

Figure S7 *continued*

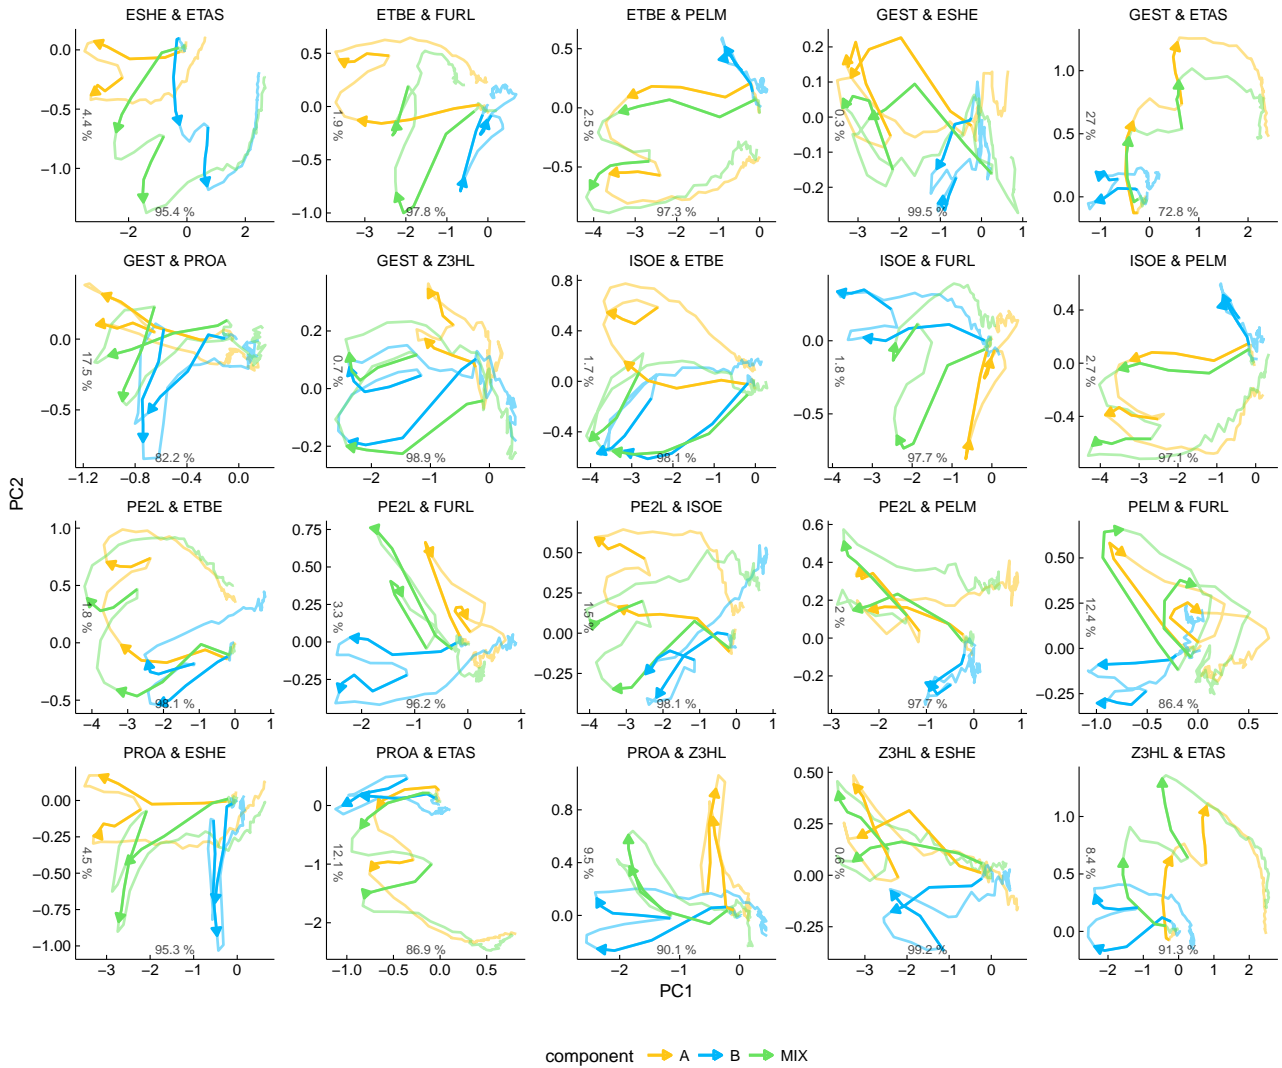

**Figure S8** Related to Figure 6. Principal component trajectories of mixture and component responses. Trajectories show how the odor response pattern of the five analyzed OSNs develops over time. Times of odorant stimulation are indicated by darker arrows pointing in the direction of time. Numbers on the axes indicate the percentage of variance explained by the corresponding principal component
